# Supplementary material for: The structures of the precursor Hf(OnBu)4 and its modification in solution: EXAFS-investigation in combination with XANES- and IR-spectroscopy
Source: Royal Society of Chemistry journal article supplement (doi:10.1039/b707079a), 2007-01-01
Supplement: b707079a.pdf [file b707079a.pdf]

### Supplementary Information

**Fig. SF1:**

XANES region of pure **1** in **2** (solid line), as well as containing three equivalents of <sup>i</sup>PrOH (short dashed line) or THF (dotted dashed line), and monoclinic HfO<sub>2</sub> (dotted line).

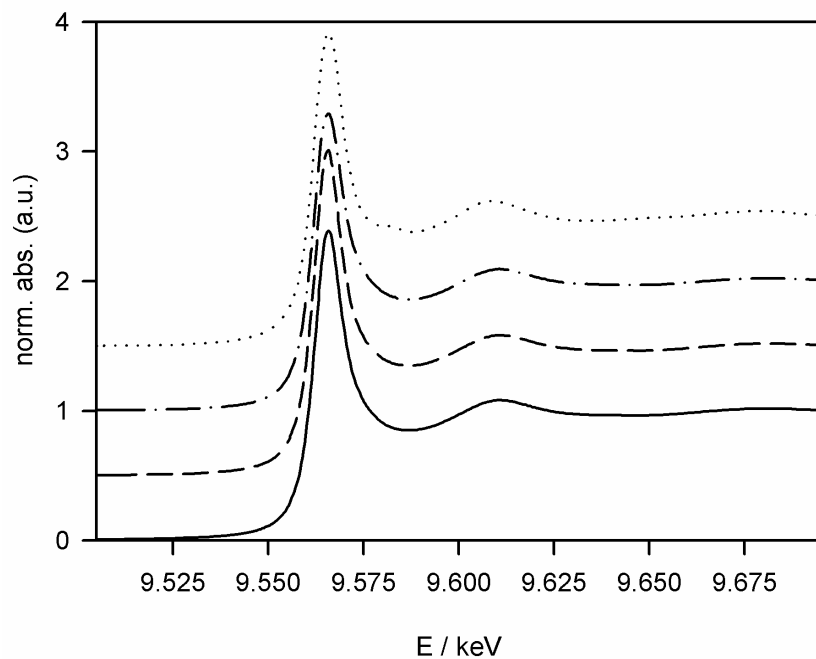

**Fig. SF2:**

Development of the integral absorption of the C=O stretching vibration in dependence of the added equivalents acetylacetonate Hacac (see also table ST1).

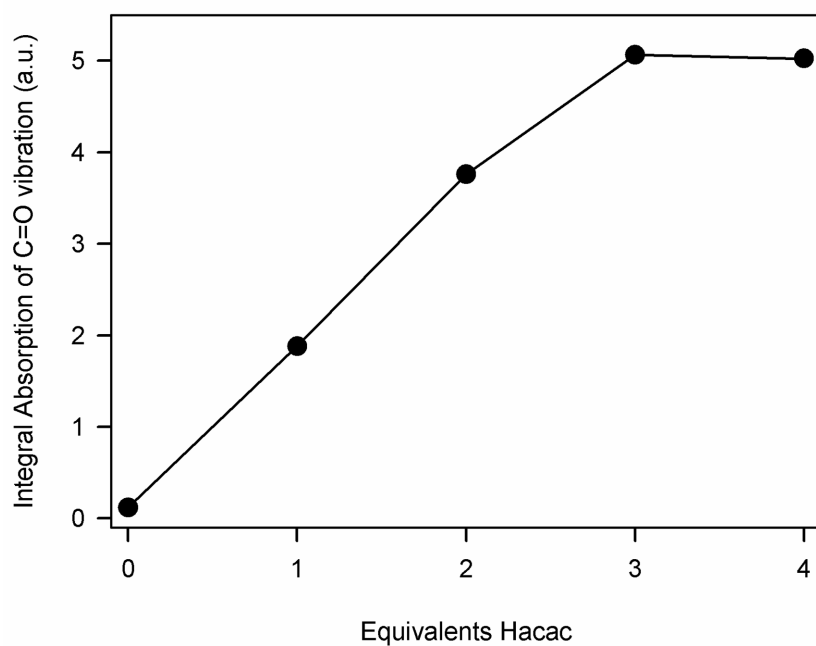

**Fig. SF3:**

Comparison of the IR-spectra of **1** in **2** (solid line), **1** in **2** with two equivalents Hacac (double dotted dashed line), and a solution of only Hacac in toluene (dashed line) in the region of the characteristic vibrations of coordinated Hacac.

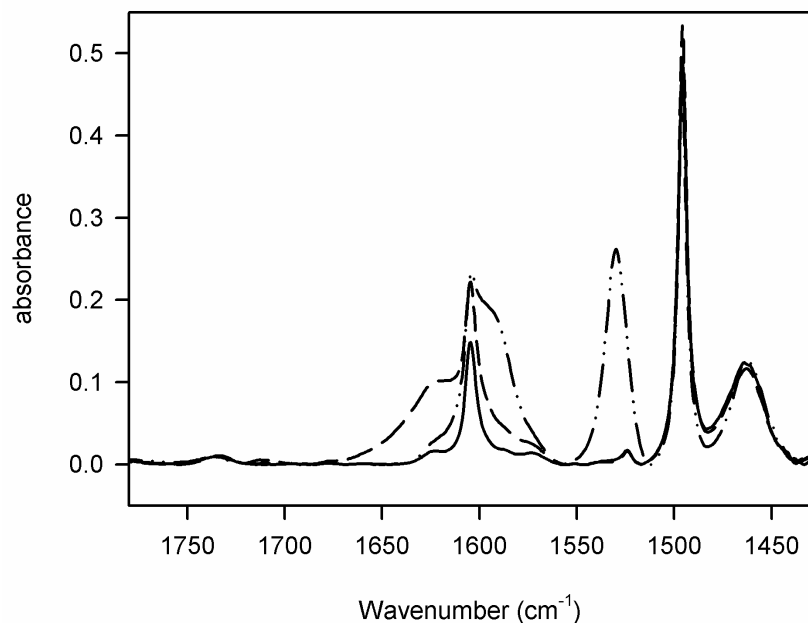

**Fig. SF4:**

IR-spectra of **1** in **2** with one (solid line), two (dotted line), three (dotted dashed line) and four (short dashed line) equivalents Hacac. Only for four Hacac characteristic vibrations of free acetylacetonone are visible.

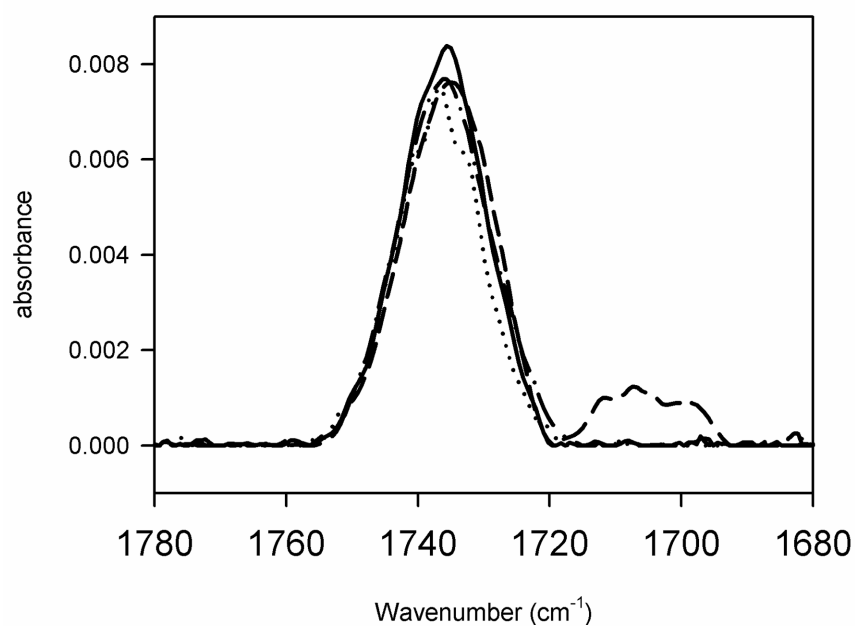

**Table S11** Characteristic values (their integrated intensity, band intensity and energies) of the C=C- and C=O-vibration bands of coordinated acetylacetonate for solutions of **1** in **2** that contain one to four equivalents Hacac.

| Sample      | C=C                                    |                      |                             | C=O                                    |                      |                             |
|-------------|----------------------------------------|----------------------|-----------------------------|----------------------------------------|----------------------|-----------------------------|
|             | Vibrational energy [cm <sup>-1</sup> ] | Signal height (a.u.) | Integrated Intensity (a.u.) | Vibrational energy [cm <sup>-1</sup> ] | Signal height (a.u.) | Integrated Intensity (a.u.) |
| 1 eq. Hacac | 1599.3                                 | 0.151                | 2.817                       | 1528.9                                 | 0.151                | 1.880                       |
| 2 eq. Hacac | 1593.7                                 | 0.167                | 4.411                       | 1529.9                                 | 0.257                | 3.758                       |
| 3 eq. Hacac | 1590.9                                 | 0.248                | 6.319                       | 1530.03                                | 0.332                | 5.064                       |
| 4 eq. Hacac | 1593.1                                 | 0.278                | 7.097                       | 1530.4                                 | 0.331                | 5.026                       |

**Scheme SS1:** Possible reactions with one equivalent Hacac under consideration of the fact, that *all* Hacac molecules coordinate and electroneutrality is maintained. The reactions mentioned in the paper are marked in yellow, with the enumeration of the paper in squared parentheses.

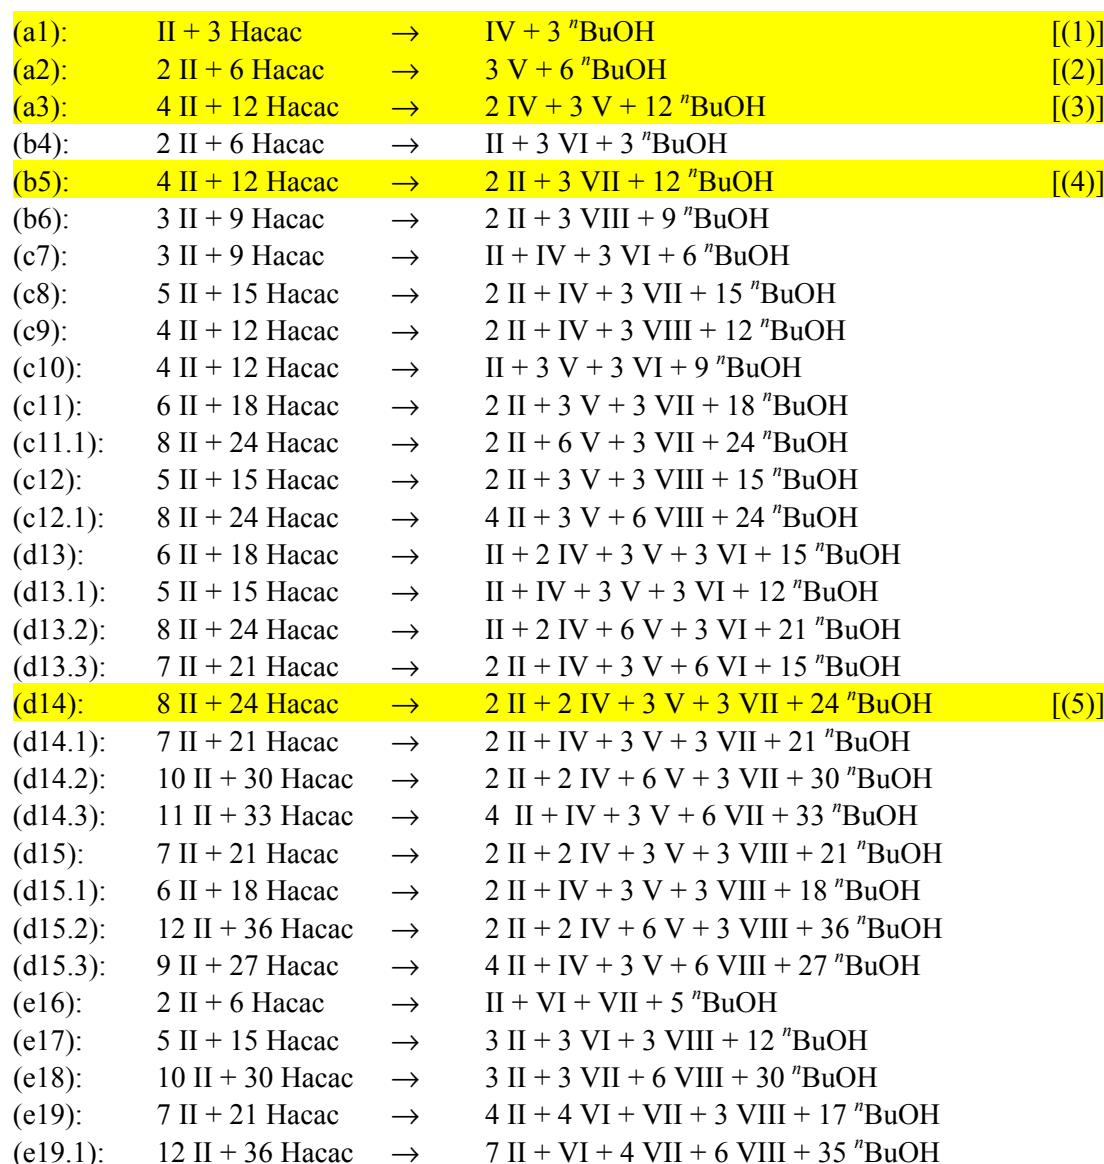

# Supplementary Material (ESI) for New Journal of Chemistry

# This journal is (c) The Royal Society of Chemistry and

Table S17. Calculated structural parameters of the possible reaction with one equivalent Hacac. The reaction which reflect the results of the EXAFS analysis best are marked in yellow.

| Equation | N(O1) | N(O2) |
|----------|-------|-------|
| (a1)     | 1.0   | 6.0   |
| (a2)     | 1.0   | 6.0   |
| (a3)     | 1.0   | 6.0   |
| (b4)     | 1.0   | 6.0   |
| (b5)     | 1.0   | 6.0   |
| (b6)     | 1.3   | 5.3   |
| (c7)     | 1.0   | 6.0   |
| (c8)     | 1.0   | 6.0   |
| (c9)     | 1.3   | 5.5   |
| (c10)    | 1.0   | 6.0   |
| (c11)    | 1.0   | 6.0   |
| (c11.1)  | 1.0   | 6.0   |
| (c12)    | 1.2   | 5.6   |
| (c12.1)  | 1.4   | 5.1   |
| (d13)    | 1.0   | 6.0   |
| (d13.1)  | 1.0   | 6.0   |
| (d13.2)  | 1.0   | 6.0   |
| (d13.3)  | 1.0   | 6.0   |
| (d14)    | 1.0   | 6.0   |
| (d14.1)  | 1.0   | 6.0   |
| (d14.2)  | 1.0   | 6.0   |
| (d14.3)  | 1.0   | 6.0   |
| (d15)    | 1.1   | 5.7   |
| (d15.1)  | 1.2   | 5.7   |
| (d15.2)  | 1.1   | 5.8   |
| (d15.3)  | 1.2   | 5.6   |
| (e16)    | 1.0   | 6.0   |
| (e17)    | 1.2   | 5.6   |
| (e18)    | 1.2   | 5.6   |
| (e19)    | 1.1   | 5.7   |
| (e19.1)  | 1.2   | 5.7   |
| (e19.2)  | 1.2   | 5.6   |

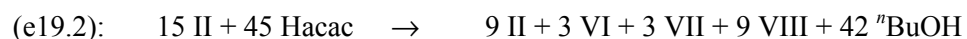

# Supplementary Material (ESI) for New Journal of Chemistry  
 # This journal is (c) The Royal Society of Chemistry and  
 # The Centre National de la Recherche Scientifique, 2007

**Table ST3** Results of the XANES fit of **1** in **2**, **1** in **2** with one to three equivalents Hacac, HfO<sub>2</sub> and Hf<sub>4</sub>O<sub>2</sub>(OMc)<sub>12</sub>.

| Sample            |                    | 1 in 2         | 1 eq. Hacac           | 2 eq. Hacac           | 3 eq. Hacac           | HfO <sub>2</sub>      | Hf <sub>4</sub> O <sub>2</sub> (OMc) <sub>12</sub> |
|-------------------|--------------------|----------------|-----------------------|-----------------------|-----------------------|-----------------------|----------------------------------------------------|
| Edge step         | Function           | arctan         | arctan                | arctan                | arctan                | arctan                | arctan                                             |
|                   | Position           | 9.5604         | 9.5620                | 9.5621                | 9.5624                | 9.5620                | 9.5619                                             |
|                   | Height             | 0.81           | 0.80                  | 0.77                  | 0.77                  | 0.87                  | 0.79                                               |
|                   | FWHM               | 0.0047         | 0.0044                | 0.0040                | 0.0046                | 0.0046                | 0.0041                                             |
|                   | Area               | 0.024          | 0.023                 | 0.021                 | 0.022                 | 0.025                 | 0.021                                              |
| White line        | Function           | asym. P-Voigt  | asym. P-Voigt         | asym. P-Voigt         | asym. P-Voigt         | asym. P-Voigt         | asym. P-Voigt                                      |
|                   | Position           | 9.5658         | 9.5660                | 9.5655                | 9.5659                | 9.5659                | 9.5666                                             |
|                   | Height             | 1.67           | 1.44                  | 1.79                  | 1.46                  | 1.65                  | 1.34                                               |
|                   | left FWHM          | 0.0079         | 0.0104                | 0.0097                | 0.0106                | 0.0102                | 0.0118                                             |
|                   | right FWHM         | 0.0084         | 0.0084                | 0.0069                | 0.0075                | 0.0083                | 0.0075                                             |
|                   | Gaussian part Area | 0.044          | 0.403                 | 0.416                 | 0.521                 | 0.465                 | 0.459                                              |
|                   | Area               | 0.020          | 0.018                 | 0.019                 | 0.017                 | 0.020                 | 0.017                                              |
|                   | Function           | asym. Gaussian | asym. Gaussian        | asym. Gaussian        | asym. Gaussian        | asym. Gaussian        | asym. Gaussian                                     |
| Signal ~ 9.58 keV | Position           | --             | 9.5791                | 9.5801                | 9.5803                | 9.5819                | 9.5800                                             |
|                   | Height             | --             | 0.050                 | 0.095                 | 0.103                 | 0.018                 | 0.070                                              |
|                   | left FWHM          | --             | 0.0252                | 0.0284                | 0.0316                | 0.0038                | 0.0092                                             |
|                   | left FWHM          | --             | 0.0047                | 0.0048                | 0.0056                | 0.0037                | 0.0059                                             |
|                   | Area               | --             | 7.97·10 <sup>-4</sup> | 1.68·10 <sup>-3</sup> | 2.04·10 <sup>-3</sup> | 7.11·10 <sup>-5</sup> | 5.61·10 <sup>-4</sup>                              |
